# Supplementary material for: Orally consumed cannabinoids provide long-lasting relief of allodynia in a mouse model of chronic neuropathic pain
Source: bioRxiv or medRxiv preprint supplement (doi:10.1101/556373), 2019-02-21

## Supplemental Information

### **Orally consumed cannabinoids provide long-lasting relief of allodynia in a mouse model of chronic neuropathic pain**

Edward J.Y. Leung<sup>1\*</sup>, Antony D. Abraham<sup>1\*</sup>, Brenden A. Wong<sup>1</sup>, Lauren C. Kruse<sup>2</sup>, Jeremy J. Clark<sup>2</sup>, Benjamin B. Land<sup>1+</sup>

1- Department of Pharmacology, University of Washington

2- Department of Psychiatry and Behavioral Sciences, University of Washington

\* equal authorship

+ Corresponding author, email: BBL2@uw.edu

3 Supplemental Figure legends

3 Supplemental Figures

## **Supplemental Figure Legends**

**Supplemental Figure 1.** Schematic of gelatin paradigm for drug gelatin pre- and post- sciatic nerve ligation. Blue-stripped boxes indicate 2-day recording periods that are quantified and displayed in **Figure 1d**.

**Supplemental Figure 2. A)** Pictures of real-time recording device, annotated. **B)** Average number of feeding bouts per 2 hrs in the light vs dark cycle for each gelatin. Dark cycle consumption is significantly greater than light cycle for all groups (n = 3-4 per group). \* p < 0.05

**Supplemental Figure 3. A)** Example of 2 non-clicks, which were rejected because of significant power in the audible range. **B)** The number of clicks in 5 minute recordings before and after pain testing for pain-naïve mice. Additionally, recordings from an empty cage show very few clicks in the absence of mice (n = 4 recordings for empty cage, n = 6 pain-naïve testing). \* p < 0.05.

Supplemental Figures

# Supplemental Figure 1

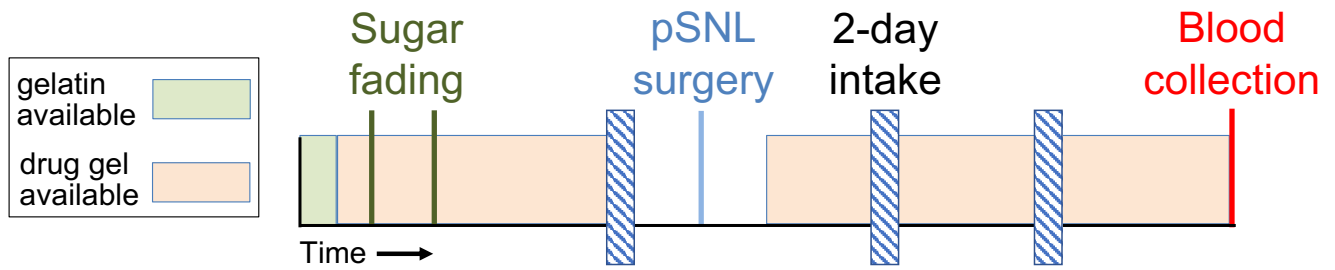

## Supplemental Figure 2

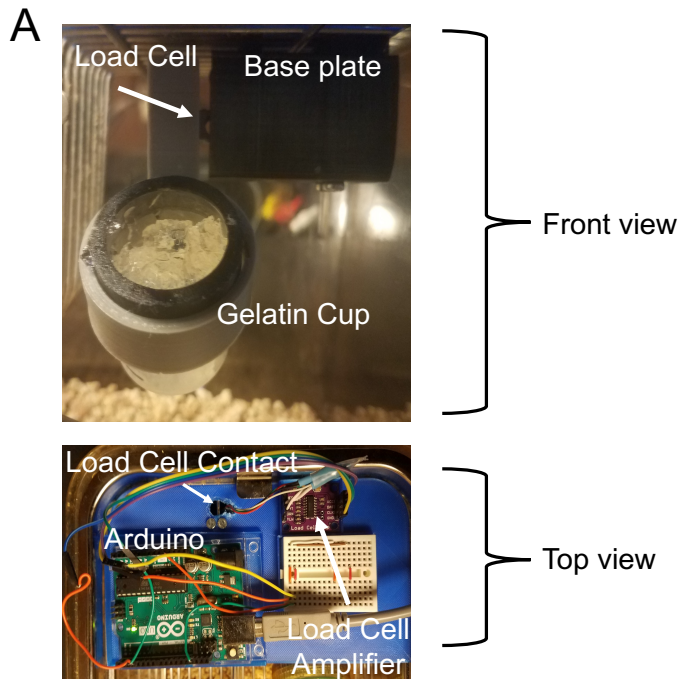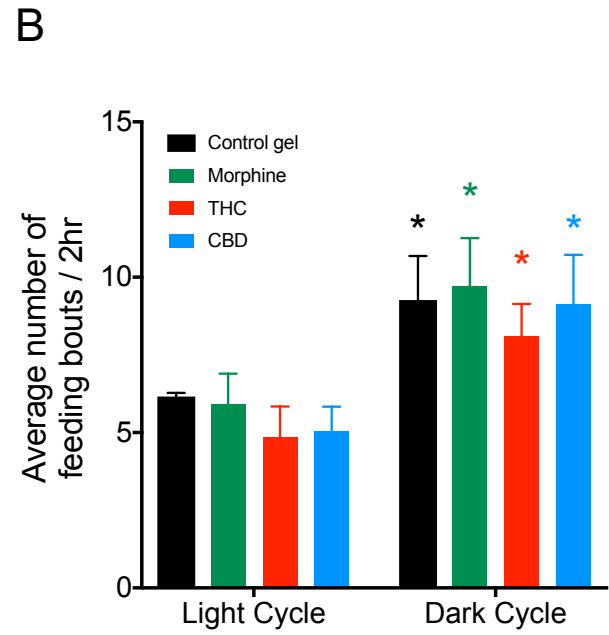

# Supplemental Figure 3

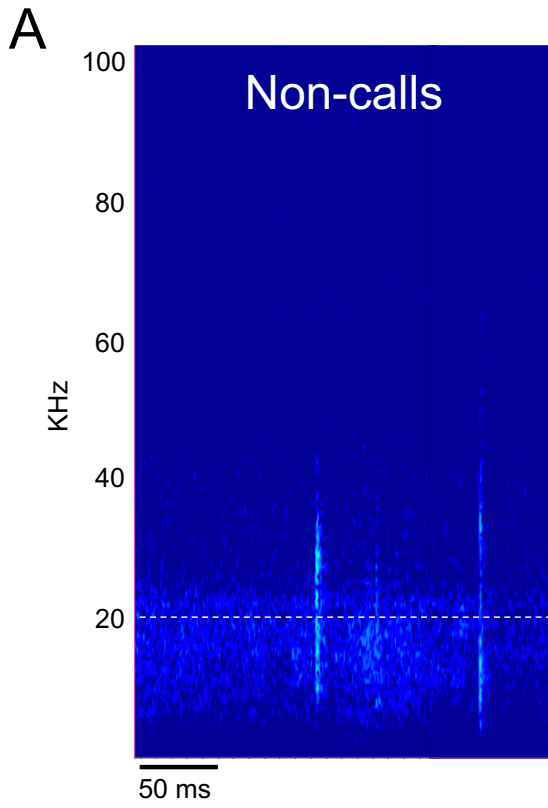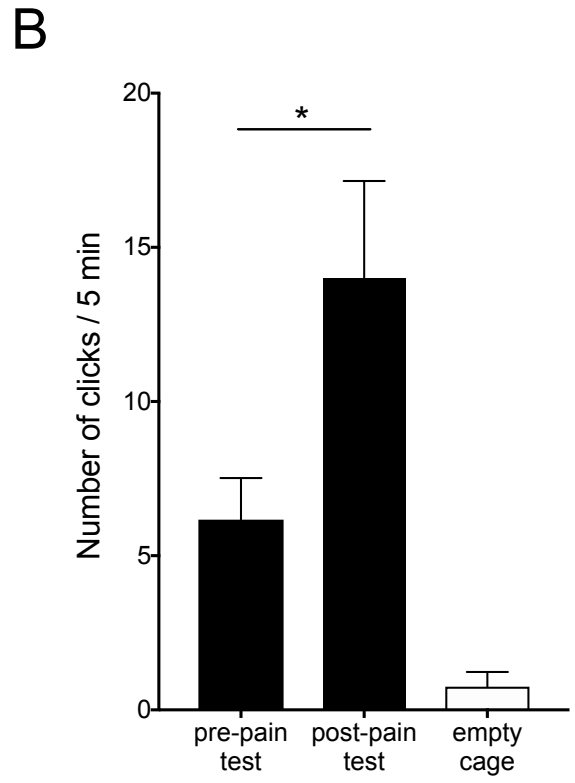

Supplement: Supplementary file [file media-1.pdf]
